# Supplementary material for: Innovations in assessment for graduate and fellowship medical education in critical care: a scoping review
Source: Research Square preprint supplement (doi:10.21203/rs.3.rs-7441779/v1), 2025-09-12
Supplement: Supplementary file 1 [file 74340a85be9bf0d95fdcca72.docx]

**Supplementary Material**

**Table A**. Population, concept, and context selection criteria, and terms used in database search

| **Elegibility criteria** | **Inclusion Criteria** | **Exclusion Criteria** |
| --- | --- | --- |
| **Population** | Interns, residents, fellows, or faculty involved in graduate or fellowship medical education | Studies focusing solely on other healthcare professionals (e.g., nursing, pharmacy, dentistry) unless physicians were included as a distinct subgroup. Pediatrics |
| **Concept** | Studies about assessmentin graduate medical education | Articles addressing **faculty assessment, curriculum evaluation, patient assessment** |
| **Context** | Formal educational settings in graduate or fellowship critical care training programs (e.g., academic hospitals, medical schools) | Non-medical educational settings |
| **Types of Evidence** | Quantitative, qualitative, or mixed-methods) studies, systematic reviews, narrative reviews | Editorials, conference abstracts without full-text availability |
| **Language** | Any language | NA |
| **Timeframe** | Studies published between January 2014 and June 2025 | NA |
| **Publication Type** | Peer-reviewed journals | Grey literature, letters to the editor, unpublished dissertations |

| **Medical Subject Headings (MeSH) and Health Science Descriptors (DeCS) terms used** | | |
| --- | --- | --- |
| **Database** | **Search Query** |
| **PubMed** | ("Education, Medical"[MeSH] OR "Education, Medical, Graduate"[MeSH] OR "Internship and Residency"[MeSH] OR graduate medical education[Title/Abstract] OR residents[Title/Abstract] OR fellows[title/Abstract] OR postgraduate training[Title/Abstract]) AND ("Critical Care"[MeSH] OR "Intensive Care Units"[MeSH] OR critical care[Title/Abstract] OR intensive care[Title/Abstract]) AND ("Educational Measurement"[MeSH] OR assessment[Title/Abstract] OR evaluation) NOT ("Nursing"[MeSH] OR "Physical Therapy Specialty"[MeSH] OR nurse* OR physiotherapist* OR veterinarian* OR "veterinary medicine"[MeSH]) NOT ("Curriculum"[MeSH] OR curriculum evaluation OR "educational program evaluation") NOT ("Diagnosis"[MeSH] OR "Diagnosis, Differential"[MeSH] OR "diagnostic techniques and procedures"[MeSH] OR "Medical History Taking"[MeSH] OR patient assessment OR clinical evaluation OR clinical assessment) NOT ("Letter"[Publication Type]) |
| **Scopus** | ( TITLE-ABS-KEY ( graduate medical education OR resident OR fellow ) AND TITLE-ABS-KEY ( critical care OR intensive care ) AND TITLE-ABS-KEY ( medical education ) AND TITLE-ABS-KEY ( assessment OR evaluation ) AND NOT TITLE-ABS-KEY ( nurse OR veterinary ) ) AND PUBYEAR > 2013 AND PUBYEAR < 2026 AND ( LIMIT-TO ( DOCTYPE , "ar" ) OR LIMIT-TO ( DOCTYPE , "re" ) ) AND ( LIMIT-TO ( SUBJAREA , "MEDI" ) OR LIMIT-TO ( SUBJAREA , "HEAL" ) ) |
| **Web of Science** | TS=("graduate medical education" OR "residency" OR "residents" OR "fellows" OR "fellowship" OR "postgraduate training") AND TS=("critical care" OR "intensive care") AND TS=("assessment" OR "evaluation" OR "educational measurement") NOT  TS=("nurse*" OR "physiotherapist*" OR "veterinarian*" OR "veterinary" OR "undergraduate" OR "medical students" OR "student*" OR "curriculum evaluation" OR "educational program evaluation" OR "patient assessment" OR "clinical evaluation" OR "clinical assessment")  NOT DT=("Letter") AND PY=(2014-2025) |
| **LILACS** | (("Educación Médica, de Posgrado"[DeCS] OR "Educación Médica"[DeCS] OR "Internado y Residencia"[DeCS] OR "formación médica de posgrado" OR "residentes" OR "fellows" OR "formación médica especializada") AND ("Cuidados Críticos"[DeCS] OR "Unidades de Cuidados Intensivos"[DeCS] OR "medicina intensiva" OR "cuidados intensivos") AND  ("Evaluación Educacional"[DeCS])) NOT  ("Enfermería"[DeCS] OR "Fisioterapia"[DeCS] OR "Pediatría"[DeCS] OR "Medicina Veterinaria"[DeCS] OR "Estudiantes de Medicina"[DeCS] OR "Educación de Pregrado en Medicina"[DeCS] OR "evaluación de programas educativos"[DeCS] OR "evaluación de pacientes" OR "diagnóstico clínico" OR "cartas al editor") |

MeSH: Medical Subject Headings; DeCS: Health Science Descriptors

**TableB. Summary of Articles Included in the Scoping Review on Assessment in Graduate Medical Education Focused on Critical Care**

| **Author (year)** | **Country** | **Design** | **Population/**  **context** | **Instruments/methods of assessment** | **Domains/competencies assessed** | **Main findings** |
| --- | --- | --- | --- | --- | --- | --- |
| Bion (2014) [3] | United Kingdom | Narrative review | Intensive Care Medicine trainees and educators across European countries | CoBaTrICE (Competency-Based Training in Intensive Care Medicine in Europe) competency framework  Workplace-based assessments (e.g., DOPS (Direct Observation of Procedural Skills), mini-CEX (Clinical Evaluation Exercise), case-based discussions), portfolios and structured feedback tools | The article discusses a set of 102 competencies organized into 12 domains, which were developed through a consensus process involving experts and linked to the background knowledge required from published syllabi of eight countries | The CoBaTrICE program established a competency framework to harmonize intensive care medicine (ICM) training across Europe, promoting standardized core competencies, professionalism, and reflective practice through workplace-based assessment, despite structural variation between countries |
| Fessler (2014) [31] | United States | Consensus statement | Pulmonary and Critical Care Medicine (PCCM) fellows; program directors and faculty involved in training and assessment | Curricular Milestones (CMs)  Entrustable Professional Activities (EPAs)  Direct observation, portfolios, and structured evaluations mapped to milestones | Procedural skills, clinical decision-making, readiness for unsupervised practice, longitudinal progression through training, patient care, knowledge, practice-based learning and improvement, professionalism, systems-based practice, interpersonal and communication skills | The document outlines ACGME (Accreditation Council for Graduate Medical Education)-defined curricular milestones and Entrustable Professional Activities (EPAs) for PCCM fellowship, providing a framework to assess procedural competence, guide independent practice readiness, and align training with the Next Accreditation System (NAS) |
| Nunnink (2014) [47] | Australia | Cross-sectional study | Senior intensive care trainees undergoing assessment in high-stakes simulated medical/crisis scenarios | High-fidelity simulation scenarios  Performance evaluation framework with four levels of competency  Structured observation of both technical and non-technical skills  Two rating scales: the Anaesthesia Non-technical Skills (ANTS) scale and the Ottawa Global Rating Scale (GRS). | Diagnosis of major clinical events, resource management, team communication and decision-making, technical skills, patient care, interpersonal and communication skills, systems-based practice, professionalism, practice-based learning and improvement | A performance evaluation framework using high-fidelity simulation to assess both technical and non-technical skills in senior intensive care trainees was feasible and acceptable, though interrater reliability was low; further validation and dedicated testing sessions are recommended |
| Tien (2014) [66] | United Kingdom | Systematic review | Surgery residents | Eye tracking technology with integrated simulation systems | Technical skills, cognitive integration, diagnostic reasoning, self-regulation and performance under stress | Eye tracking technology enhances skill acquisition and performance by promoting expert gaze strategies; useful in surgical training and assessment, with potential to improve focus, learning, and diagnostic accuracy. |
| Vieillard-Baron (2014) [35] | United States, Australia, New Zealand, Hong Kong, France, Europe, Asia-Pacific, Canada | Consensus statement | Intensivists and critical care trainees pursuing advanced critical care echocardiography (CCE) competency in ICU settings. | Minimum number of supervised studies  Standardized written and practical exams  Direct skill evaluations by expert faculty | Technical skills, clinical integration, decision-making, patient care, knowledge, practice-based learning, and systems-based practice | An international consensus statement defines structured training and assessment standards for CCE, requiring supervised studies, standardized exams, and competency in image acquisition and interpretation for managing cardiovascular instability. |
| Clardy (2015) [54] | United States | Narrative review | Pulmonary and critical care medicine fellows and faculty involved in diagnostic reasoning and curriculum development | Not specified; conceptual emphasis on integrating reasoning strategies, outcome-based education (ACGME framework), and reflective practices into curricula and faculty assessment frameworks | Clinical reasoning, patient-centered care, communication, quality improvement and self-reflection; emphasis on the six ACGME’s core competencies (patient care, knowledge, professionalism, interpersonal and communication skills, practice-based learning and improvement, system-based practice | The article advocates for a shift in pulmonary and critical care training towards inductive reasoning and integration of cognitive strategies, patient-centered care, and continuous self-reflection, with faculty development essential to support this transformation. |
| Martin (2015) [16] | United States | Cohort study | Internal medicine residents | The **UPDATED audit tool,** a checklist designed to evaluate the quality of **written handoff communications. UPDATED** is an acronym that stands for **U**pdated information, Patient summary, **D**isease/diagnosis, **A**nticipated problems, **T**asks to complete, and **E**vents of the day | Written communication, patient care continuity, professionalism and accountability, and system-based practice | A pilot study showed the UPDATED tool effectively improved written handoff communication among internal medicine interns; it enabled timely feedback and supported ACGME-aligned assessment, though broader validation is needed. |
| O'Gara (2015) [59] | United States | Consensus statement | Cardiology fellows pursuing training in critical care cardiology | Direct observation  Simulation and procedural logs  Didactic evaluations  Milestone and level-based competency assessments | Technical skills, interdisciplinary teamwork, patient care, knowledge, systems-based practice, interpersonal and communication skills, professionalism, and practice-based learning and improvement. | COCATS 4 Task Force 13 outlines competency-based training standards for critical care cardiology aligned with ACGME, emphasizing structured levels of training, interdisciplinary collaboration, and use of multiple assessment tools to ensure readiness for managing critically ill cardiovascular patients. |
| Patrawalla (2015) [39] | United States | Validation of an assessment tool | First-year critical care medicine (CCM) fellows undergoing simulation-based assessment for critical care ultrasound skills (CCUS) skills. | Behaviorally anchored checklists for two critical care ultrasound applications: deep venous thrombosis (DVT) and left ventricular function.  Global rating scales (for comparison)  Direct observation (live and video-based) of CCUS performance | Technical skills, clinical application, patient care, knowledge, practice-based learning, and system-based practice (use of diagnostic technology) | A competency assessment tool using behaviorally anchored checklists for CCUS showed strong validity and reliability for DVT but variable results for Echo; the study supports live rater use and programmatic assessment integration in ultrasound training. |
| Wingo (2015) [53] | United States | Narrative review | Graduate medical education residents across specialties; interprofessional team members (e.g., nurses, pharmacists) involved in collaborative clinical care | Direct observation tools (adapted for individual assessment within teams)  Interprofessional feedback instruments (proposed or reviewed)  Limited use of validated, standardized tools—further development recommended | Interprofessional collaboration, communication, role clarity and respect within healthcare teams, clinical integration in team-based care, professionalism, systems-based practice, and practice-based learning | The article advocates for standardized, observation-based assessment of interprofessional collaboration in graduate medical education, emphasizing real-world, team-based settings and individual accountability to improve training and accreditation alignment. |
| Barrett (2016) [21] | Ireland, The Netherlands, Canada | Narative review | Postgraduate medical trainees (primarily in the UK) and their assessors | WBAs: Mini-CEX, DOPS, case-based discussion, Objective Structured Assessment of Technical Skills (OSATS)  Multisource Feedback (MSF), which includes tools like the Mini-Peer Assessment Tool (Mini-PAT) and Team Assessment of Behavior (TAB), also referred to as 360-degree feedback | Practical skills, technical abilities, communication skills, judgment, systems-based practice, practice-based learning, and professionalism | A review of 20 studies found mixed evidence on WBAs’ effectiveness in identifying underperformance in postgraduate medical trainees. Multisource feedback (MSF) shows more promise than single-assessor tools, but limitations in methodology and triangulation challenge their utility for remediation |
| Cocciante (2016) [46] | Australia | Validation of an assessment tool | Critical care medicine fellowship applicants and faculty assessors. | Simulation-based assessments  Nontechnical skills were evaluated using the Ottawa Crisis Resource Management Global Rating Scale (Ottawa GRS).  Personality inventories  Faculty observation and structured feedback | Non-technical skills (e.g., communication, decision-making, stress response), personality traits, situational awareness and teamwork, interpersonal and communication skills, professionalism, systems-based practice, and ractice-based learning and improvement | Integrating simulation-based assessments and personality testing into critical care trainee selection was feasible and well-received for simulation, though personality testing was viewed as less fair; results support further exploration of non-technical skill evaluation in candidate selection |
| Gaudet (2016) [38] | Canada | Validation of an assessment tool | Postgraduate subspecialty residents, who were learning focused critical care echocardiography (FCCE) as part of a new curriculum in the intensive care unit | FCCE-specific performance assessment tool (validated)  Serial evaluations of echocardiographic studies with performance tracking | Technical skills, clinical application, patient care, knowledge, practice-based learning, and systems-based practice (use of a bedside diagnostic test) | An assessment tool for focused critical care echocardiography (FCCE) effectively tracked trainee improvement, though proficiency remained below expert level after 20 studies, emphasizing the need for extended, structured training in ultrasound competency. |
| Gustin (2016) [14] | United States | Validation of an assessment tool | Pulmonary and critical care medicine fellows at the end of their first year of training | Family Meeting Behavioral Skills Checklist (FMBSC)  SEGUE Framework: Set de stage, Elicit information, Give information, Understand the patient’s perspective, and End the encounter  Video-recorded simulated family meetings | End-or-life communication, empathy, shared decision-making, professionalism, patient care, practice-based learning and improvement | Using video recordings and validated tools, the study assessed communication skills of pulmonary/critical care fellows during simulated family meetings, demonstrating a method for structured, blinded evaluation of end-of-life communication competence. |
| Meier (2016) [60] | United States | Cohort study | General surgery residents (across all postgraduate year levels) and faculty assessors | Milestone-based assessment instruments  Resident self-evaluation forms  Faculty rating tools | Patient Care, Medical Knowledge, Professionalism, Interpersonal and Communication Skills, Practice-Based Learning and Improvement, and Systems-Based Practice (ACGME) | Milestone-based assessment systems in general surgery residency programs show strong correlation between training level and competency scores, particularly benefiting junior residents. These tools enhance formative feedback, self-reflection, and faculty engagement, though broader validation is needed |
| Nassar (2016) [51] | Canada, United States | Mixed methods study | Trauma team leaders (typically senior residents or fellows) in trauma resuscitation training settings | MacTRAUMA TTL (Trauma Team Leader) assessment tool  Direct observation with structured rating scales | Initial critical assessment, clinical performance, decision-making, communication, leadership, patient care, systems-based practice, knowledge, and professionalism | The MacTRAUMA TTL Assessment Tool evaluates trauma team leaders’ technical and non-technical skills; while it demonstrated strong reliability in initial assessment, other domains need refinement and improved rater training for broader use. |
| Van Mook (2016) [28] | The Netherlands | Narrative review | Postgraduate trainees in Intensive Care Medicine | Online progress tests  Computer-adaptive testing systems  National item bank linked to the intensive care medicine curriculum | Knowledge, clinical reasoning, practice-based learning and improvement, systems-based practice | Progress testing in Dutch Intensive Care Medicine training offers formative feedback and supports certification by integrating online, adaptive assessments; challenges include content relevance and balancing with workplace-based learning. |
| Voduc (2016) [18] | Canada | Validation of an assessment tool | Medical trainees (e.g., residents and fellows) performing bronchoscopy | Ontario Bronchoscopy Assessment Tool (OBAT)  12-item rubric with 5-point scale (expert-derived) | Procedure planning, technical skills, decision-making, ost-procedure management, patient care, knowledge, practice-based learning, professionalism (in procedural safety and independence) | The Ontario Bronchoscopy Assessment Tool (OBAT) reliably evaluates bronchoscopy competency across planning, execution, and post-procedure care, distinguishing skill levels among trainees; further validation in novice learners is needed. |
| Ketterer (2017) [55] | United States | Validation of an assessment tool | Emergency Medicine residents and program directors involved in training and assessment | Supplemental milestones mapped to ACGME framework  Program director evaluations and structured observational tools | Systems-based practice, practice-based learning and improvement, interpersonal and communication skills, professionalism, and medical knowledge | Development of supplemental milestones in Emergency Medicine to better assess resident progress in domains like critical care, leadership, and career development; intended to enhance curriculum evaluation and resident tracking. |
| Ottinger (2017) [94] | United States | Before and after study | Surgical residents involved in trauma care and sign-out processes | Trauma Morning Report (TMR)  Structured evaluation of communication components (pre-/post-training) | Handoff and sign-out communication, interpersonal and communication skills, patient care, systems-based practice, practice-based learning and improvement | A structured training program using the Trauma Morning Report (TMR) significantly improved surgical residents’ communication and sign-out skills in trauma care, with sustained performance benefits, though continued reinforcement may be needed |
| Boyle (2018) [52] | United States | Cross-sectional study | Critical care providers at various levels, including resident physicians, and critical care fellows | Multi-scenario high-fidelity simulation  Holistic scoring rubric  Behavioral checklists (for comparison) | Cognitive decision-making, clinical reasoning, situational awareness and prioritization, knowledge, patient care, practice-based learning and improvement, systems-based practice (team coordination under stress) | A multi-scenario simulation assessment effectively differentiated cognitive decision-making skills across experience levels in ICU providers; holistic scoring was more reliable than checklists, supporting its use in standardized, competency-based critical care training. |
| Kumari (2018) [33] | India | Before and after study | Junior residents in the Department of Anesthesia and Intensive Care at Chandigarh, India. | Procedure-specific checklists and Global Rating Scales | Technical skills (central venous catheter insertion), communication during procedures, preparation and complication awareness | Assessment of anesthesia residents’ procedural skills, particularly central line insertion, showed that targeted educational interventions led to significant early improvements. Emphasis was placed on preparation, communication, and complication management, with tools like checklists and global rating scales supporting individualized skill tracking |
| Soffler (2018) [45] | United States | Narrative review | Fellows, faculty, and program directors in pulmonary and critical care medicine, particularly those involved in procedural training and assessment | Smulation | Teamwork, communication skills, and critical thinking | Simulation-based education in pulmonary and critical care is underused for summative assessment; authors advocate for its role in objectively evaluating procedural, communication, and critical thinking skills, while noting the need for validated tools and addressing implementation challenges. |
| Tiwari (2018) [71] | United States | Cohort study | Anesthesiology critical care medicine fellows at an ACGME-accredited fellowship | Data Envelopment Analysis (DEA) for efficiency measurement  Tracking of procedural timing and educational activity participation | Clinical workload and procedural frequency, educational engagement (e.g., conference attendance), efficiency in balancing service and learning activities, patient care, practice-based learning and improvement, systems-based practice, professionalism | Using Data Envelopment Analysis (DEA), the study found that critical care fellows with greater clinical engagement and shorter time between procedures were more efficient, suggesting clinical exposure outweighs formal education in performance metrics and supporting DEA as an objective evaluation method |
| Lord (2019) [32] | Canada | Cross-sectional study | Junior medical/surgical residents assessed during central venous catheter (CVC) insertion training | OSATS (Objective Structured Assessment of Technical Skills)  O-SCORE (Ottawa Surgical Competency Operating Room Evaluation)  Procedural checklists  Critical error tracking tools | Technical skills, critical error identification, patient care, knowledge, practice-based learning and improvement, and professionalism (procedural safety) | Global rating scales (OSATS, O-SCORE) demonstrated higher reliability than checklists or error tools for assessing CVC insertion skills in junior residents, supporting their use in competency-based education despite study limitations. |
| Prince (2019) [42] | United States | Cohort study | Nephrology fellows undergoing assessment in acute kidney replacement therapy and electrolyte emergencies | Objective Structured Clinical Examination (OSCE)  Standardized cases Checklist and faculty scoring tools | Clinical decision-making, procedural knowledge, written communication, patient care, practice-based learning, and system-based practice | Implementation of a nephrology-focused Objective Structured Clinical Examination (OSCE) revealed skill gaps in hyperkalemia management and acute dialysis ordering; used as a formative assessment to guide curriculum improvement and track fellow progression. |
| Van Bockel (2019) [61] | The Netherlands | Expert panel | Postgraduate trainees in Intensive Care Medicine (ICM); clinical supervisors and educators | Entrustable Professional Activities (EPAs)  EPAsICM framework aligned with CoBaTrICE and CanMEDS  Supervisor judgment and workplace-based assessments | The CoBaTrICE competencies focus on knowledge, skills, and attitudes, while the CanMEDS framework includes roles such as medical expert, communicator, collaborator, health advocate, leader, scholar, and professional. They are integrated into the EPAs for Intensive Care Medicine (EPAsICM) to provide a comprehensive assessment in real-world clinical scenarios | The EPAsICM framework promotes the use of Entrustable Professional Activities to assess real-world clinical competence in Intensive Care Medicine, aligning with CoBaTrICE and CanMEDS, while highlighting the need for validation and faculty engagement in meaningful assessment |
| Woolf (2019) [57] | United Kingdom | Systematic review | Trainee doctors in the UK across multiple specialties undergoing Annual Review of Competence Progression (ARCP). | Annual Review of Competence Progression (ARCP), a high-stakes assessment tool based on multiple sources, that determines the annual promotion of residents.  Supervisor reports, portfolios, workplace-based assessments (indirectly referenced) | Clinical skills, professionalism, knowledge application, reflection and self-assessment, patient safety, systems-based practice, practice-based learning, patient care | The ARCP process in the UK faces concerns about reliability, validity, feedback quality, and equity; the authors call for standardization, better feedback, and continuous evaluation to improve trainee development and patient safety. |
| Yang (2019) [50] | Taiwan | Before and after study | Internal medicine residents participating in critical care simulation and ICU rotations | High-fidelity simulation (HFS) scenarios  Knowledge pre- and post-tests  Clinical evaluations during ICU rotations | Clinical reasoning and decision-making, procedural skills, knowledge application, patient care, medical knowledge, practice-based learning and improvement, and systems-based practice | High-fidelity simulation (HFS) improved internal medicine residents’ knowledge and skills in critical care, with simulation performance correlating more strongly with ICU clinical performance than with post-test scores, supporting HFS as a valid tool for assessing clinical competence. |
| Bergl (2020) [22] | United States | Before and after study | Intensive care unit (ICU) fellows (intervention group), internal medicine residents (learners), and faculty in a tertiary-care medical ICU | Direct observation by faculty  Structured field notes and surveys (fellows, residents)  Qualitative feedback from learners and educators | Teaching and supervision, clinical decision-making, learner engagement, communication, practice-based learning, professionalism, systems-based practice | A fellows-as-teachers intervention improved fellows’ engagement in teaching and decision-making, but residents perceived a decline in the educational value of rounds, highlighting tensions in near-peer teaching dynamics. |
| Klein (2020) [74] | United States | Cross-sectional study | Internal medicine residents and faculty evaluators across six U.S. residency programs | Assessments that included 20 of 22 internal medicine-specific reporting Milestones and six core competencies (ACGME) | The six core competencies of ACGME: patient care, medical knowledge, systems-based practice, practice-based learning and improvement, professionalism, and interpersonal and communication skills | A multi-site U.S. study found gender-based disparities in internal medicine resident evaluations. Female residents scored higher in PGY-2 but plateaued in PGY-3, while male residents continued to improve. Faculty gender influenced ratings, suggesting potential bias and a "glass ceiling" effect |
| Perkins (2020) [19] | United States | Narrative review | Surgical residents and their educators | ACGME (Accreditation Council for Graduate Medical Education) Milestones, traditional questionnaires, simulation-based training, video-based coaching, smartphone-based tools, and crowdsourcing | The six core competencies of the ACGME Milestones system for assessing resident development: Medical knowledge, patient care, professionalism, interpersonal and communication skill, practice-based learning and improvement, and systems-based practice. | A multimodal approach to evaluating surgical residents—using simulation, video-based coaching, mobile apps, and crowdsourcing—can enhance communication and technical skills; emphasizes formative feedback and calls for further research on assessment strategies. |
| Sistrom (2020) [48] | United States | Cross-sectional study | Radiology residents participating in simulated critical care imaging assessments | Full-resolution simulation platform  Diagnostic scoring system | Diagnostic interpretation in critical care imaging  Performance under fatigue and time pressure  Case complexity management (e.g., neurologic vs. non-neurologic cases), knowledge, patient care (via diagnostic accuracy), practice-based learning and improvement, and systems-based practice (managing acuity and clinical urgency) | A full-resolution simulation platform effectively assessed radiology residents’ performance in critical care imaging; results showed performance improved with training but was affected by case difficulty, acuity, and fatigue, supporting its use for competency-based assessment and progression decisions |
| Sistrom (2020)[49] | United States | Cross-sectional study | Radiology residents participating in simulated critical care imaging assessments | Simulation-based radiology case assessments | Diagnostic interpretation skills, clinical reasoning, knowledge, patient care (via image-based decision-making), practice-based learning and improvement | A simulation-based assessment model for radiology residents revealed that case difficulty most strongly influenced score variation, followed by resident competence, supporting the model’s value for enhancing education across programs. |
| Antonacci (2021) [65] | United States | Before and after study | General surgery residents in their 4th and 5th postgraduate years (PGY4–PGY5) from a single residency program over a two-year period | **Morbidity & Mortality Adverse Event Reporting System (MARS)**, a structured tool incorporating a standardized critique algorithm to assess morbidity data, error identification, and standard of care management. The **Clavien-Dindo** and **Institute for Healthcare Improvement** harm scales, cognitive bias assessments, and standard of care evaluations for all cases | Diagnostic reasoning, technical performance, clinical judgment, systems-based issues, communication effectiveness. (ACGME core competencies frame) | Integrating core competency (CC) self-assessment into morbidity reviews significantly improved surgical residents’ ability to identify diverse types of clinical errors, enhancing critical thinking and promoting progression towards clinical competence without affecting overall care standards. |
| Aryal (2021) [12] | United Kingdom | Systematic review | Trainees and trainers in postgraduate surgical specialties | Procedure-Based Assessments (PBAs)  Clinical Evaluation Exercises (CEXs)  Case-Based Discussions (CBDs)  Direct Observation of Procedural Skills (DOPS) | Procedural competence, clinical decision-making, feedback and reflective practice, assessment-related stress and engagement | A systematic review of WBAs in surgical training found that while tools like PBAs and DOPS offer educational benefits, concerns about summative use, assessor leniency, time pressures, and trainee anxiety limit their effectiveness. Emphasis on formative feedback and improved implementation is needed |
| Chen (2021) [44] | Taiwan | Cohort study | Emergency Medicine residents | High-fidelity simulation-based exams  Traditional written exams  Oral examinations | Clinical decision-making, technical skills, real-time problem solving, teamwork and communication under pressure, patient care, knowledge, communication skills, systems-based practice | High-fidelity simulation exams demonstrated superior discriminative ability in assessing emergency medicine residents’ clinical competency compared to written and oral formats, supporting their integration into training. |
| Heath (2021) [56] | United States | Cohort study | Internal Medicine residents transitioning into Pulmonary-Critical Care Medicine (PCCM) fellowship programs | ACGME Milestones  Retrospective review of milestone ratings across training stages | Professionalism, communication skills, progression of competency development, practice-based learning and improvement | A multicenter study found that strong milestone performance in Internal Medicine residency, particularly in professionalism and communication, predicts better competency ratings in Pulmonary-Critical Care fellowship, supporting the value of longitudinal assessment. |
| Panebianco (2021) [36] | United States, Canada | Descriptive study | Critical care physicians from various specialties, primarily anesthesiology and pulmonary/critical care, who use echocardiography | Critical Care Echocardiography Examination (CCEeXAM) | Knowledge, clinical judgement and decision-making, technical and interpretive skills, | Development and initial implementation of the CCEeXAM to certify independent competence in critical care echocardiography; first exam in 2019 with 81.3% pass rate; broad uptake by anesthesiology and critical care physicians. |
| Piquette (2021) [30] | Canada | Before and after study | Medical residents undergoing ICU rotations | Script concordance test (SCT) for cognitive reasoning  OSATS for procedural skills  Communication skills assessment through a written test  Procedural simulations  Simulated encounter with a "family member" | Cognitive reasoning, procedural skills, and communication skills | Multiple assessment tools applied during ICU rotations showed improvement in residents' cognitive reasoning and procedural skills, but limited progress in communication abilities. Feasibility was acceptable, though issues like feedback delays and scheduling barriers were noted |
| Weller (2021) [23] | Australia, New Zealand | Scoping review | Medical trainees across specialties; educators and program designers implementing WBA systems | 30 innovative WBA tools categorized by seven key dimensions: frequency of assessment, granularity, curriculum coverage, rating method, initiation of assessment, information use, and incentives | The scoping review provides a general overview of the types of competencies that are commonly assessed by workplace-based assessment tools, such as professionalism, interpersonal/communication skills, and written communication, depending on tool and context | A review of 30 workplace-based assessment (WBA) innovations identified seven key dimensions—frequency, granularity, coverage, rating methods, initiation, incentives, and information use—highlighting the need for reliable, detailed, and context-sensitive tools to improve trainee performance and educational outcomes |
| Castanelli (2022) [24] | Australia, New Zealand | Qualitative research | Postgraduate anaesthesia trainees from across Australia and New Zealand | Workplace-Based Assessments (WBAs) (qualitative focus on their use and impact) | The article does not refer to specific competencies assessed by WBAs | The study highlights how power dynamics and trust influence trainee engagement in workplace-based assessments (WBAs). Trainees often adapt their behavior to supervisors’ expectations to gain acceptance, and higher trust levels enable more authentic learning and assessment interactions |
| Castellanos-Ortega (2022) [43] | Spain | Cross-sectional study | Third-year Intensive Care Medicine residents in Spain | Simulation-based OSCE  Scenario-based structured evaluations (five clinical crisis situations) | Technical and non-technical skills in Intensive Care Medicine. These included clinical decision-making, procedural skills, communication, professionalism, and teamwork. | A simulation-based OSCE across five crisis scenarios revealed that only half of third-year ICM residents in Spain met expected competency levels, highlighting variability in protocol adherence and non-technical skills, and supporting simulation as a reliable tool for identifying training gaps |
| Kamat (2022) [34] | India | Before and after study | Postgraduate anesthesiology students | Direct Observation of Procedural Skills (DOPS)  Structured observation forms and immediate feedback | Procedural skills, clinical judgement, patient care, knowledge, practice-based learning, professionalism, and communication skills | The study showed that DOPS significantly improved anesthesiology postgraduate students’ procedural skills and was well-received by faculty and learners, supporting its integration into training as a more effective alternative to traditional assessments |
| Rajamani (2022) [37] | Australia, Spain, Italy, United Kingdom, Canada, The Netherlands, Sweden, Singapore, India, France, China, New Zealand, Portugal, United States. | Consensus statement | Critical care trainees and practitioners; expert panel participants from critical care, cardiology, and ultrasound fields | Structured assessments (e.g., DOPS, logbooks)  Direct observation by mentors  Image portfolio reviews  Objective structured evaluations (e.g., OSCEs) | Technical skills, knowledge, patient care, patient-based learning, communication, professionalism, and continuous learning | Delphi consensus produced structured guidelines for a Basic Critical Care Echocardiography (BCCE) competence program, emphasizing training schedules, feedback, mentorship, and objective assessment, with high expert agreement. |
| Baboolal (2023) [13] | South Africa, United Kingdom | Mixed methods study | Medical specialist trainees and trainers across 16 specialties in South Africa | Workplace-Based Assessments (WBAs); the most frequently reported were the Mini-CEX and DOPS. Other tools included video consultation tools, OSCE, the Royal College WBA Implementation Guide, the Royal Australian and New Zealand College of Psychiatrists 360-degree evaluation, a self-designed WBA tool based on the Canadian model, a Communication Skills Observation Tool, and case-based discussions | The study assessed competencies based on the AfriMEDS competency framework, which includes the following areas: professional, scholar/teacher, effective communicator, collaborator, and leader/manage | In South Africa, medical trainees face systemic challenges—workload, inadequate infrastructure, and strained trainer relationships—that affect training quality and well-being. While WBAs improve supervision and feedback, gaps remain, emphasizing the need for a more trainee-centered, supportive educational environment |
| Conroy (2023) [63] | United States | Qualitative study | Attending pulmonary and critical care physicians supervising residents and fellows in a medical ICU at a single U.S. academic medical center | No formal assessment tools used; findings relate to **informal entrustment practices** and their implications for **EPAs** and **competency-based assessment frameworks** | Delegation of clinical responsibility, trust formation in clinical teams, clinical reasoning in supervisory roles, trainee autonomy and decision-making | Entrustment decisions in the ICU are complex, context-sensitive, and influenced by factors beyond trainee competence—such as task demands, clinical circumstances, team dynamics, and prior experience with the trainee. These findings challenge the use of entrustment as a purely objective assessment tool and call for more structured, reflective, and team-informed decision-making processes |
| Gunter (2023) [69] | United States | Cross-sectional study | Acute Care Surgery (ACS) fellows and supervising faculty at a tertiary academic center. | Mobile/web-based documentation platform  Real-time supervisor-completed surveys  Milestone-linked performance metrics | Clinical performance and procedural competence, command and control, decision-making, technical skills, case complexity and decision-making, patient care, knowledge, systems-based practice, interpersonal and communication skills, practice-based learning and improvement, and professionalism | A mobile, web-based platform effectively documented real-time supervision and performance metrics for ACS fellows, supporting competency-based education with efficient, structured feedback, though findings are limited to a single site. |
| Haas (2023) [68] | United States | Cross-sectional study | Emergency medicine residents and faculty participating in clinical performance evaluations during resuscitations and acute care scenarios | SIMPL (System for Improving and Measuring Procedural Learning) mobile app  Real-time, dictated and rated evaluations by faculty | Procedural skills, communication and decision-making under pressure, autonomy, patient care, knowledge, practice-based learning and improvement | The SIMPL mobile app enabled real-time, structured feedback for emergency medicine residents, with faculty valuing its usability and residents preferring dictated comments over numeric ratings; it shows promise as a supplement to traditional assessments. |
| Israel (2023)[40] | United States | Validation of an assessment tool | Pulmonary and Critical Care Medicine (PCCM) fellows undergoing Critical Care Ultrasound (CCUS) training | EPA-based CCUS assessment tool  Modified Ottawa Entrustability Scale  Direct observation with entrustment ratings | The study assessed competencies based on the I-AIM framework, which includes four subcompetencies of point-of-care ultrasound (POCUS): indication, acquisition, interpretation, and medical decision-making. This framework is conceived as a hierarchy of skills, ranging from basic learning to advanced integration (Technical skills) | An EPA-based assessment tool for Critical Care Ultrasound (CCUS) was validated with strong reliability and content validity; entrustment scores correlated with procedural frequency, highlighting the importance of observation, feedback, and adequate resources in training. |
| Lett (2023) [75] | United States | Cohort study | Medical residents in emergency medicine | Standardized residency evaluation forms (unspecified) | Interpersonal and communication skills, medical knowledge, patient care, practice-based learning and improvement, professionalism, and system-based practice. (ACGME) | The review highlights persistent racial and gender disparities in emergency medicine residency assessments, with underrepresented minority (URM) female residents receiving lower scores than White male peers, particularly in 4-year programs. The gap widens over time, pointing to systemic bias and the need for targeted DEI efforts |
| Mughal (2023) [25] | United Kigndom | Systematic review | Postgraduate surgical trainees and trainers | Workplace-Based Assessments (WBAs), including mini-CEX, DOPS, and case-based discussions | The study does not explicitly mention specific competencies in the context of WBAs. Instead, it focuses on the perceptions of surgical trainees regarding the educational value, feedback quality, and the pressures associated with WBAs, as well as their challenges | Surgical trainees perceive WBAs as a "tick-box" task with limited educational value, citing assessor bias, unclear purpose, and quota pressure. These challenges undermine feedback quality and trainee engagement, prompting UK reforms to refocus WBAs on formative learning |
| Carsky (2024) [70] | United States | Cohort study | General surgery residents | MARS (Morbidity and Mortality Assessment and Reporting System) software  Structured electronic case review and scoring  Faculty-validated error identification benchmarks | Critical thinking and clinical reasoning, error recognition and analysis, case synthesis skills, cognitive bias awareness, practice-based learning, patient care, systems-based practice, professionalism | Use of the MARS software enhanced morbidity and mortality conference learning by improving surgical residents’ error identification and critical thinking, especially among seniors; case summaries and cognitive bias recognition remained areas for growth. |
| Chang (2024) [62] | United States | Cohort study | Surgical residents and faculty evaluators | Digital evaluation tools (DET)  Electronic Health Records (EHR)-Integrated platforms | Medical knowledge, patient care, interpersonal and communication skills, professionalism, systems-based practice, and practice-based learning and improvement | Digital tools and EHR-integrated platforms improve EPA completion in surgical education; human-centered design and automated prompts enhance feedback efficiency and user engagement. |
| Dube (2024) [76] | United States | Expert panel | Graduate medical trainees (residents and fellows) in the United States who engage in direct clinical care with patients experiencing language discordance | Validated oral language proficiency tests  Self-assessments with formative feedback  Standardized patient encounters in medical Spanish  Feedback from interpreters and bilingual staff  Integration into milestone evaluations | Proficiency in language-appropriate communication, effective use of interpreter services, cultural sensitivity and humility, advocacy for linguistically inclusive care systems, self-reflection and continuous improvement in cross-linguistic care. Aligned with ACGME competencies | The study proposes a new subcompetency focused on language-appropriate care for graduate medical trainees. It emphasizes formal assessments of linguistic proficiency, incorporation of interpreter training, and integration of language equity into learning environments. The aim is to enhance patient care for individuals with limited English proficiency and promote health equity through standardized training and assessment tools |
| Hoffman (2024) [27] | Australia, New Zealand | Cross-sectional study | Intensive care physician candidates undergoing final certification exams through the College of Intensive Care Medicine (CICM) | CICM Hot Case examination  Proposed structured scoring rubric | Clinical reasoning and decision-making, patient assessment under time constraints, communication and professionalism during case discussion, patient care, knowledge | The CICM Hot Case exam, used for intensive care physician credentialing, shows low reliability (0.42); increasing the number of cases and standardizing scoring are recommended to improve its validity as a high-stakes assessment. |
| Ismaeel (2024) [73] | Canada | Scoping review | Medical students and trainees, across diverse social identity groups (gender, race, ethnicity, age | Assessments in clinical and simulation environments. WBAs assessments such as intraoperative autonomy and mini-CEX | The article does not refer to specific competencies | A scoping review of 66 studies reveals persistent bias in medical education assessments related to gender, race, ethnicity, and age. Women and learners from historically underrepresented or marginalized groups often experience disadvantages in specific assessment contexts |
| Liao (2024)[67] | Taiwan | Randomized crossover study | Final year undergraduate medical students and postgraduate year physicians from three hospitals in Taiwan | Written pretest  Simulation-based performance assessment (graded by need for assistance)  NASA_Task Load Intex to measure perceived cognitive load  Time to task completion and error tracking | Patient care, procedural skills, situalional awareness and decision-making, cognitive workload management, independent task execution. ACGME aligned. | Augmented reality ultrasound significantly improved trainee performance and reduced cognitive load during simulated ultrasound-guided central venous catheter placement compared to standard ultrasound. Benefits were particularly evident among junior and female trainees, with reduced procedure time, less instructor assistance, andl lower effort and frustration scores |
| Marcotte (2024) [20] | United States | Narrative review | Medical undergraduate and graduate trainees | Formative assessments (e.g., direct observation, feedback tools)  Patient care outcome data  Co-designed feedback systems involving educators and learners | Clinical reasoning and decision-making, patient care, communication, professionalism, and reflective practice | Advocates for precision education through formative, transparent, and equitable assessment systems co-produced with trainees; cautions against overattributing patient outcomes to individuals and promotes data-informed, learner-centered evaluation. |
| Mitchell (2024) [17] | Canada | Mixed methods study | Surgical residents assessed during on-call clinical shifts | Western University Call Assessment Tool (WUCAT)  10-item evaluation form developed via nominal group technique | Clinical decision-making, communication and handover, professionalism under pressure, prioritization and resource management, patient care, professionalism, systems-based practice, and practice-based learning | The Western University Call Assessment Tool (WUCAT) reliably evaluates surgical residents’ on-call performance across ten key competencies, improving the structure and quality of feedback; broader applicability remains to be tested. |
| O'Keeffe (2024) [29] | Ireland, United States | Validation of an assessment tool | Surgical trainees enrolled in core training programs in Ireland | Core Training Assessment System (CTAS)  OSATS for technical skills  Modified Calgary Cambridge checklist non-technical skills in simulation scenarios  WBAs  Multiple Mini Interviews (MMIs)  OSCE | Clinical knowledge and technical skills, communication and decision-making, professionalism and readiness for advancement, patient care, professionalism, practice-based learning and improvement | The Core Training Assessment System (CTAS) in Ireland demonstrated high reliability and strong inter-method correlations, offering a robust, holistic framework for evaluating surgical trainees through integrated WBAs, OSCEs, and MMIs |
| Scholte (2024) [26] | Switzerland, The Netherlands | Qualitative study | Intensive Care Medicine (ICM) trainees and supervising ICU physicians in Switzerland | ICU-STAR framework, which stands for Introduce/Inform, Clarify, Undertake, Shared bedside care, Teach, Assess, and Reflect Structured collaboration and digital tracking  Qualitative data from physicians on supervision and assessment practices | Continuity of supervision  Progress monitoring and visualization  Feedback and coaching quality  CanMEDS framework, which includes seven competency roles for postgraduate medical education, introduced in intensive care medicine training programs by CoBaTrICE | Swiss ICU physicians report challenges in trainee assessment due to discontinuity, limited feedback, and poor progress tracking. The ICU-STAR framework proposes structured collaboration, shared care, and digital tools to enhance supervision, communication, and assessment |
| Woodworth (2024) [58] | United States | Expert panel | Anesthesiology residents in U.S. training programs (pilot tested across 7 institutions) | 25 EPAs  Procedural skill assessments  11 Nontechnical Skills Assessments  6 OSCEs | Aligned with ACGME competencies:  Clinical care and procedural skills, professionalism, communication, systems-based practice, non-technical/behavioral performance, clinical judgment and decision-making | A programmatic assessment system for anesthesiology residency was developed using expert consensus and piloted over 24 months. It integrates EPAs, procedural skill assessments, non-technical skills assessments, and OSCEs to comprehensively address 99% of level 1–4 Anesthesiology Milestones 2.0. Score progression with training level and partial correlation with Clinical Competency Committee ratings support its validity. |
| Castellanos-Ortega (2025) [64] | Spain | Multicenter cluster randomized trial. | Intensive care residents from thirteen Spanish ICU Departments | **WPAs, portfolio, simulation-based Objective Structured Clinical Exam (OSCE) performed at the end of the 5th year of training period** | The study assessed competencies aligned with the CoBaTrICE framework, including clinical decision-making, technical skills, communication, teamwork, patient safety, professionalism, and crisis management, using simulation-based scenarios. | Residents trained with the CoBaTrICE model demonstrated a non-significant trend toward higher competency levels and greater completion of critical essential performance elements (CEPE) compared to those in a traditional time-based program. Despite this, limited use of workplace-based assessments (WBA) constrained definitive conclusions about CoBaTrICE’s superiority. |
| Edwards (2025)[41] | United States | Cross-sectional study | Anesthesiology residents | **No universal or standardized assessment tool** used across programs.  Among programs with assessment: Hands-on skill evaluations, formal written exams, image/video interpretation reviews, completion of required scan logs.  Many programs do not conduct any formal assessment. | **Patient care and procedural skills, medical knowledge** (via written exams and interpretation), implicit reference to **systems-based practice** (through curricular implementation efforts and resource challenges). ACGME framework | The study revealed substantial variability in POCUS training across U.S. anesthesiology residency programs, with most relying on informal bedside instruction, lectures, online modules, and simulation. While a majority support implementing a standardized curriculum, only 35% offer mandatory POCUS rotations and 60% lack formal assessment methods. Major barriers to standardization include limited trained faculty, time constraints, and inconsistent assessment practices |
| Leonard (2025) [15] | United States | Validation of an assessment tool | Residents and fellows from a single institution | **RISE Assessment** (Rochester Improvement and Safety Education). A milestone-based self-assessment tool administered online, designed to evaluate competencies in patient safety, quality improvement, performance improvement, and team effectiveness. It uses structured rubrics to measure proficiency across 4 domains, 8 subdomains, and 52 content areas | **Patient safety, quality improvement, performance improvement, team effectiveness.** Aligned with ACGME milestones. | The RISE (Rochester Improvement and Safety Education) Assessment demonstrated construct validity through consistent score increases with training progression and over time. It shows potential as a standardized framework for evaluating patient safety and QI education, though limited by single-site implementation and reliance on self-assessment |
| Smirnova (2025) [72] | Canada, United States | Narrative review | Medical learners and practicing health professionals across all levels of medical education | Programmatic assessment  Workplace-based assessment  Authentic assessments using human judgment  Data-enabled assessments (e.g., AI-integrated tools)  Longitudinal, multi-source assessments | Clinical competence, professionalism, contextual and adaptive expertise, equity and social accountability, longitudinal learner development | The article proposes a shift towards transformational, development-oriented, and socially accountable assessment systems that prioritize longitudinal learner growth, equity, and trust. It highlights the integration of technology and contextualized data, emphasizes the role of human judgment in assessment, and identifies key barriers such as data silos, assessment burden, and ethical concerns. The findings support redesigning assessment to better align with real-world patient care, health equity, and societal needs |
